# Supplementary material for: An in situ engineered CuCo2S4@CuCo2O4 heterojunction with an O–S interpenetrated interface as a photoanode for selective photoelectrochemical bioanalysis
Source: Royal Society of Chemistry journal article supplement (doi:10.1039/d0ta01089h), 2020-01-01
Supplement: d0ta01089h1.pdf [file d0ta01089h1.pdf]

**In-situ engineered  $\text{CuCo}_2\text{S}_4@\text{CuCo}_2\text{O}_4$  heterojunction with O-S  
interpenetrated interface as photoanode for selective  
photoelectrochemical bioanalysis**

Qiong Wang<sup>ab</sup>, Lei Zhang<sup>a\*</sup>

1. Experimental section

\* Corresponding author. Tel.: +86 24 62207809; Fax: +86 24 62202380.

*E-mail address:* [zhanglei63@126.com](mailto:zhanglei63@126.com) (L. Zhang).

## 1.1 Chemicals

L-Cysteine (L-Cys) was bought from Aladdin Biological Co., Ltd (Shanghai). Cupric chloride ( $\text{CuCl}_2 \cdot 2\text{H}_2\text{O}$ ), cobaltous chloride ( $\text{CoCl}_2 \cdot 6\text{H}_2\text{O}$ ), urea ( $\text{CO}(\text{NH}_3)_2$ ), ammonium fluoride ( $\text{NH}_4\text{F}$ ) and sodium sulfide ( $\text{Na}_2\text{S}$ ) were analytical purity and bought from Sinopharm Company (Shenyang). The compound amino acid injections bought in local pharmacies.

## 1.2 Apparatus

The crystalline phase of  $\text{CuCo}_2\text{O}_4$  and  $\text{CuCo}_2\text{S}_4@\text{CuCo}_2\text{O}_4$  was investigated by X-ray diffraction (XRD, Siemens D5000, Germany). The microstructure of  $\text{CuCo}_2\text{O}_4$  and  $\text{CuCo}_2\text{S}_4@\text{CuCo}_2\text{O}_4$  were investigated in field emission scanning electron microscope equipped with an energy dispersive spectroscopy (EDS) detector (HITACHI SU8000, Japan, SEM) and transmission electron microscopy (TecnaiG220, USA, TEM). Electronic state of  $\text{CuCo}_2\text{O}_4$  and  $\text{CuCo}_2\text{S}_4@\text{CuCo}_2\text{O}_4$  were acquired by X-ray photoelectron spectroscopy (Thermo ESCALAB 250Xi, USA, XPS). The UV-Vis diffuse reflectance spectra of  $\text{CuCo}_2\text{O}_4$  and  $\text{CuCo}_2\text{S}_4@\text{CuCo}_2\text{O}_4$  were acquired by a UV2550 (UV-Vis DRS, Shimadzu Scientific Instruments Inc. Japan).

## 1.3 Sample preparation

To confirm the feasibility, the proposed  $\text{CuCo}_2\text{S}_4@\text{CuCo}_2\text{O}_4/\text{CC}$  PEC sensor was employed to analyze L-Cys in human urine, serum and compound amino acid injections. Prior to analysis, the urine and serum samples were centrifuged at 4000 rpm for 5 min and filtered by nylon membrane filters (0.22  $\mu\text{m}$ ), the supernatant liquid was appropriately diluted with 0.1 M PB (pH 7.0) before detection. The compound amino

acid injection was used directly without any purification.

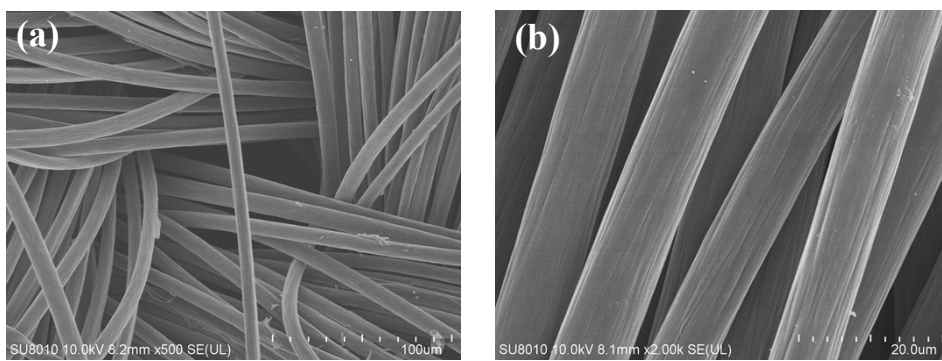

Fig. S1 The SEM images of carbon cloth

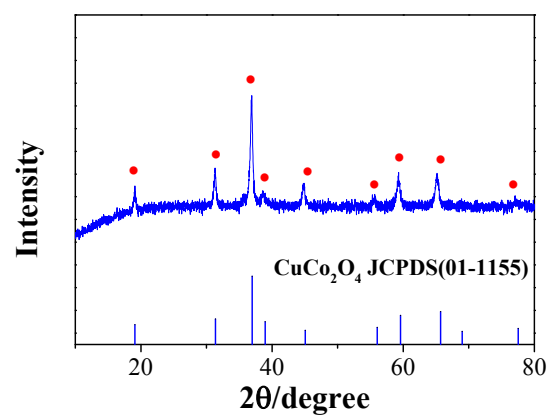

Fig. S2 The XRD of the  $\text{CuCo}_2\text{O}_4$ .

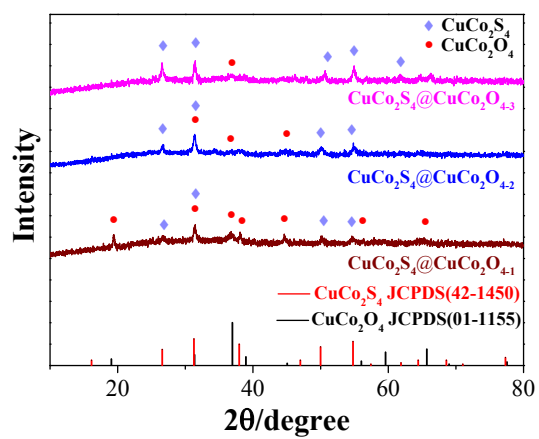

Fig. S3 The XRD of  $\text{CuCo}_2\text{S}_4@\text{CuCo}_2\text{O}_{4-1}/\text{CC}$ ,  $\text{CuCo}_2\text{S}_4@\text{CuCo}_2\text{O}_{4-2}/\text{CC}$  and  $\text{CuCo}_2\text{S}_4@\text{CuCo}_2\text{O}_{4-3}/\text{CC}$

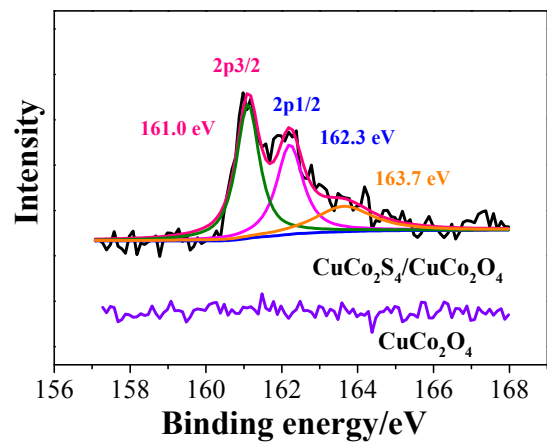

Fig. S4 XPS spectra of S

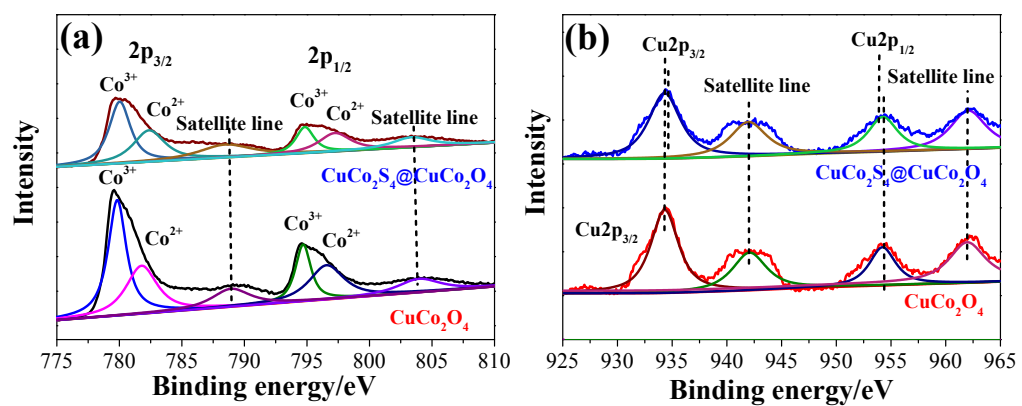

Fig. S5 XPS spectra of Co (a) and Cu (b)



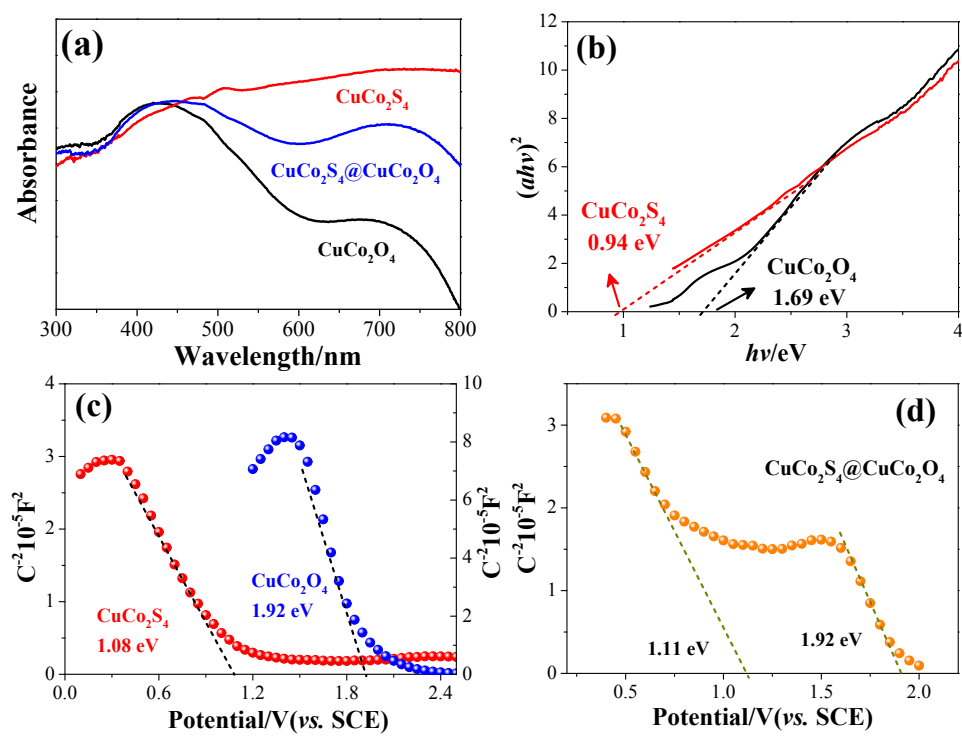

Fig. S6 UV-Vis DRS (a); plots of  $(ah\nu)^2$  versus photo energy(b); M-S curve of

CuCo<sub>2</sub>O<sub>4</sub> and CuCo<sub>2</sub>S<sub>4</sub>(c); M-S curve of CuCo<sub>2</sub>S<sub>4</sub>@CuCo<sub>2</sub>O<sub>4</sub>(d)

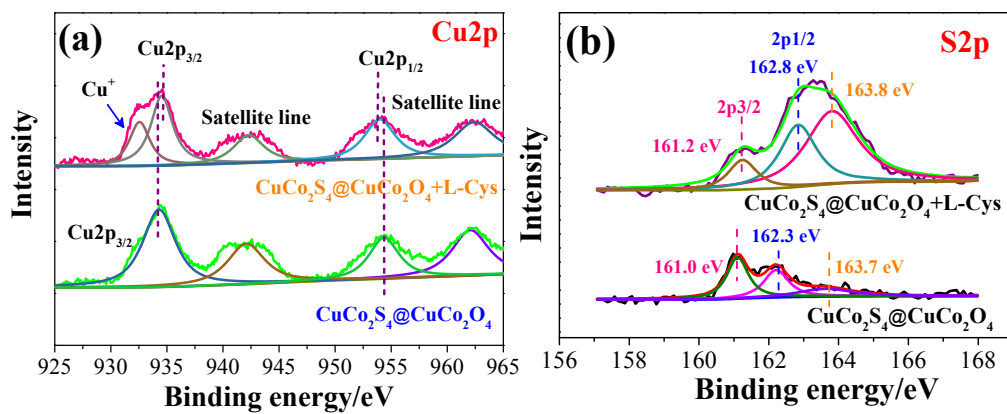

Fig. S7 Cu (a), S (b) XPS spectra of  $\text{CuCo}_2\text{S}_4@ \text{CuCo}_2\text{O}_4$  and  $\text{CuCo}_2\text{S}_4@ \text{CuCo}_2\text{O}_4\text{-L-Cys}$

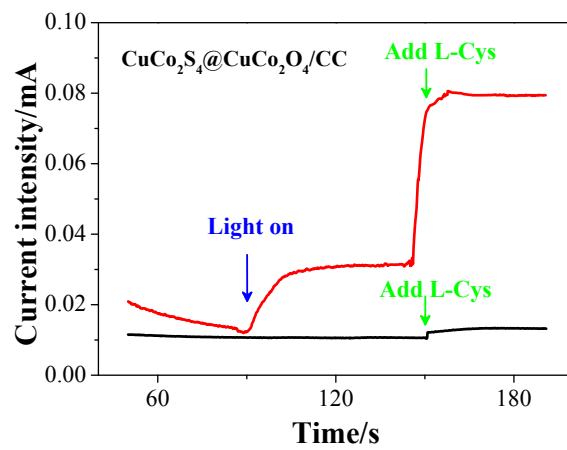

Fig. S8 The influence of light irradiation for the response of  $\text{CuCo}_2\text{S}_4@\text{CuCo}_2\text{O}_4$  to  $0.5 \mu\text{M}$  L-Cys

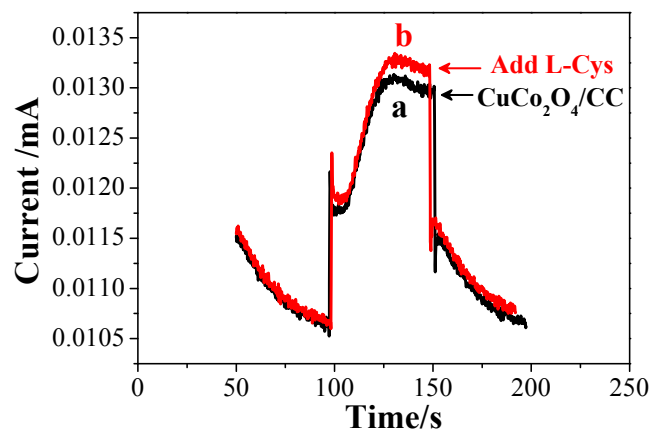

Fig. S9 The  $i-t$  response of  $\text{CuCo}_2\text{O}_4$  without (a) and with  $0.5 \mu\text{M}$  L-Cys (b)

The reproducibility of the  $\text{CuCo}_2\text{S}_4@\text{CuCo}_2\text{O}_{4.2}/\text{CC}$  was evaluated. Five independently  $\text{CuCo}_2\text{S}_4@\text{CuCo}_2\text{O}_{4.2}/\text{CC}$  electrodes were fabricated and applied to the detection of L-Cys under the same condition. The relative standard deviation (RSD) value is less than 4.1%, demonstrating a good reproducibility. The repeatability of the  $\text{CuCo}_2\text{S}_4@\text{CuCo}_2\text{O}_{4.2}/\text{CC}$  sensor were study by using the same electrode for 10 repeated experiments, and the RSD value was about 3.7%, suggesting excellent repeatability. As shown in Fig. S7, the photocurrent of  $\text{CuCo}_2\text{S}_4@\text{CuCo}_2\text{O}_{4.2}/\text{CC}$  shows little change after 10 repeated lights on-off illumination cycles. The results indicate the formation of  $\text{CuCo}_2\text{S}_4@\text{CuCo}_2\text{O}_{4.2}/\text{CC}$  integration electrode with interpenetrated interface is beneficial to the transfer of photogenerated carriers and avoid  $\text{CuCo}_2\text{S}_4@\text{CuCo}_2\text{O}_{4.2}$  falling off from the CC substrate, which is effective to enhance the stability and durability of PEC sensor.

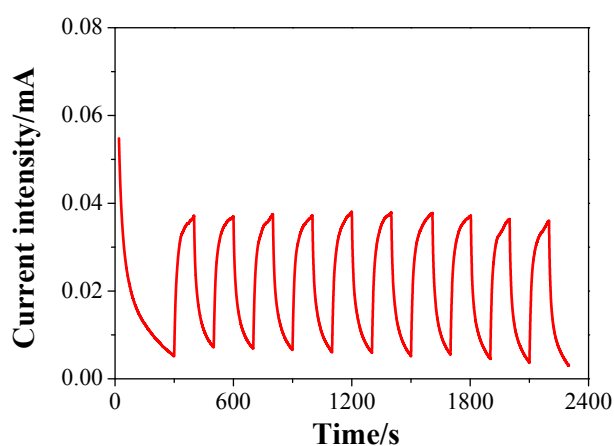

Fig. S10 The photocurrent stability of the  $\text{CuCo}_2\text{S}_4@\text{CuCo}_2\text{O}_{4.2}/\text{CC}$

The application ability of the  $\text{CuCo}_2\text{S}_4@\text{CuCo}_2\text{O}_{4-2}/\text{CC}$  PEC sensor was evaluated by assaying L-Cys in human serum, urine and injection samples. As shown in Table S1, the recoveries are in the range from 90.0 to 117.0%, and the RSD value was about 5.2%, showing a satisfactory result.

Table S1 Analytical result of L-Cys in the real samples

| Sample                         | Spiked ( $\mu\text{mol L}^{-1}$ ) | Found ( $\mu\text{mol L}^{-1}$ ) | R%    | RSD% |
|--------------------------------|-----------------------------------|----------------------------------|-------|------|
| Compound amino acid injections | 0                                 | 2.32                             | —     | 3.2  |
|                                | 0.1                               | 2.41                             | 90.0  | 5.2  |
|                                | 5                                 | 7.18                             | 97.2  | 4.7  |
|                                | 25                                | 27.35                            | 101.2 | 3.6  |
|                                | 0.1                               | 0.117                            | 117.0 | 4.0  |
| Urine                          | 5                                 | 5.08                             | 101.6 | 4.8  |
|                                | 25                                | 24.67                            | 98.7  | 3.5  |
|                                | 0.1                               | 0.091                            | 91.0  | 3.9  |
| Serum                          | 5                                 | 4.73                             | 94.6  | 4.5  |
|                                | 25                                | 24.95                            | 99.8  | 3.3  |

<sup>a</sup> Mean of three measurement
